# Supplementary material
Source: PubMed Central journal article supplement (PMC3950936)
Supplement: NIHMS548787-supplement-Supporting_Information.pdf [file NIHMS548787-supplement-Supporting_Information.pdf]

**Supplemental Information for:**

**Implantable silk composite microneedles for programmable vaccine release kinetics and enhanced immunogenicity in transcutaneous immunization**

Peter C. DeMuth<sup>1#</sup>, Younjin Min<sup>2#</sup>, Darrell J. Irvine<sup>1,3-7</sup>, and Paula T. Hammond<sup>2-4</sup>

<sup>1</sup>Department of Biological Engineering, Massachusetts Institute of Technology  
(MIT), Cambridge, Massachusetts, 02139 USA

<sup>2</sup>Department of Chemical Engineering, MIT, Cambridge, MA, USA

<sup>3</sup>Koch Institute for Integrative Cancer Research, MIT, Cambridge, MA, USA.

<sup>4</sup>Institute for Soldier Nanotechnologies, MIT, Cambridge, Massachusetts, 02139 USA.

<sup>5</sup>Department of Materials Science and Engineering, MIT, Cambridge, Massachusetts, 02139 USA.

<sup>6</sup>Ragon Institute of MGH, MIT, and Harvard, Charlestown, Massachusetts, 02129 USA.

<sup>7</sup>Howard Hughes Medical Institute, Chevy Chase, Maryland, 20815 USA.

# P.C.D. and Y.M. contributed equally to this work.

Correspondence should be addressed to D.J.I. (djirvine@mit.edu) and P.T.H (hammond@mit.edu)

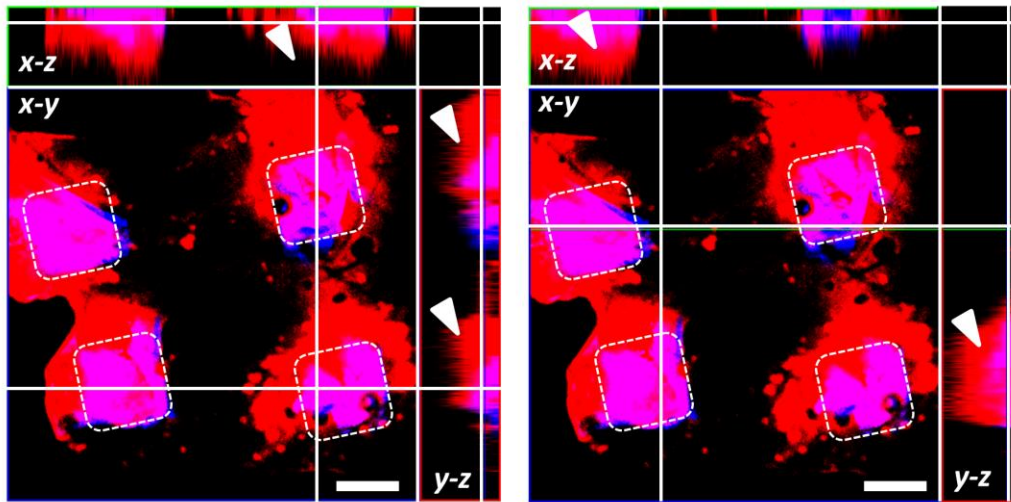

**Supplemental Figure 1** | Composite microneedles give effective cutaneous delivery. Reconstructed confocal  $x$ - $y$ / $x$ - $z$ / $y$ - $z$  images depicting the microneedle application site showing deposition of cargos within the cutaneous tissue (AF647-OVA – blue, AF555-OVA – red, overlay – pink, scale bar 200  $\mu$  m).

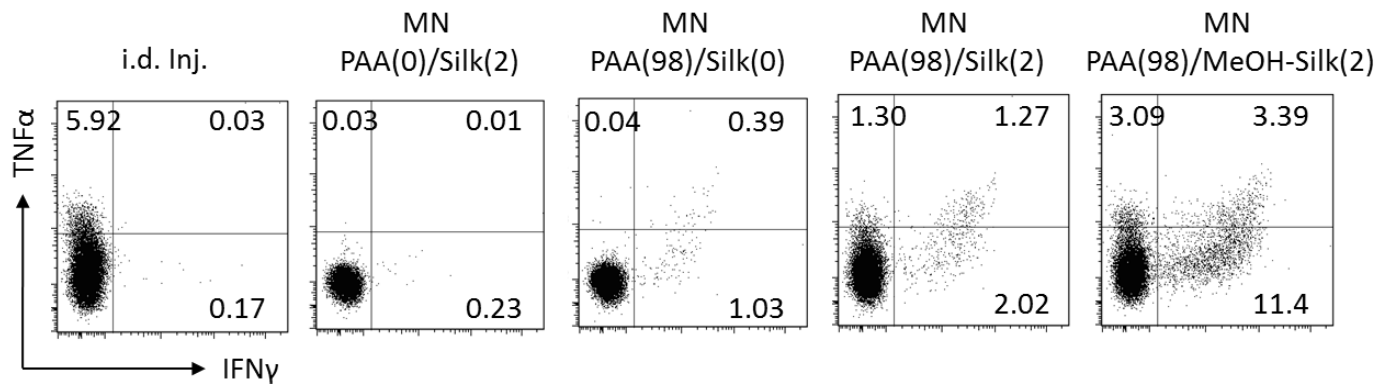

**Supplemental Figure 2** | Microneedle vaccination gives enhanced effector function. Flow cytometry analysis of inflammatory cytokine expression following *ex vivo* antigen stimulation of PBMCs. Shown are representative cytometry plots of IFN $\gamma$ <sup>+</sup>/TNF $\alpha$ <sup>+</sup> CD8<sup>+</sup> T cells measured on day 14.

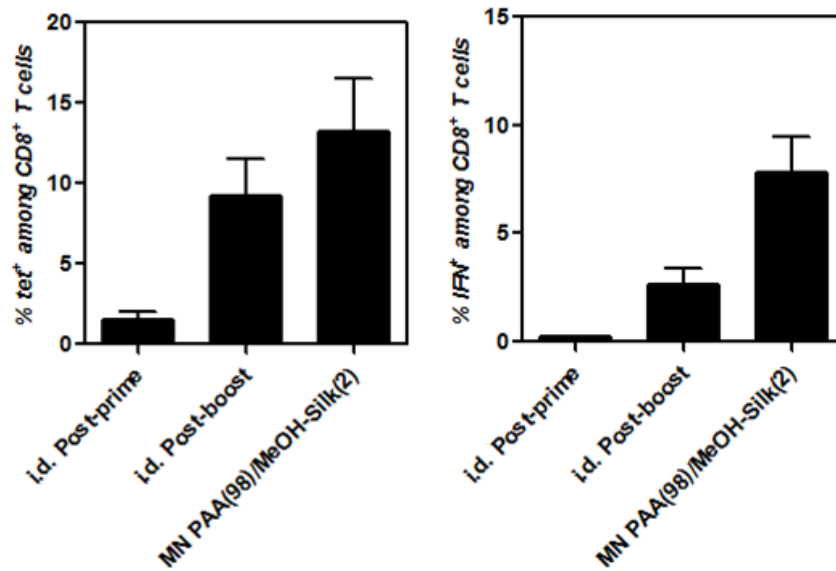

**Supplemental Figure 3** | Single microneedle vaccination gives comparable cellular immunity relative to prime-boost injection. Mice were vaccinated on day 0 and 35 by i.d. injection, or on day 0 by microneedle treatment (+methanol to cross-link silk implants) to deliver 9  $\mu$ g OVA and 150 ng polyI:C. . Microneedles were fabricated with 98% of the total vaccine dose in the PAA fraction, with the remaining 2% in the silk implant (MN PAA(98)/MeOH-Silk(2)). Flow cytometry analysis of antigen-specific CD8<sup>+</sup> T cell proliferation and cytokine secretion in peripheral blood. Shown is quantitative analysis of peak SIINFEKL-tetramer<sup>+</sup> CD8<sup>+</sup> T cell frequencies for 14 days following either prime or boost immunization (left) and frequencies of IFN $\gamma$ <sup>+</sup> among CD8<sup>+</sup> T cells on day 14 post prime/boost following *in vitro* restimulation with SIINFEKL (right).

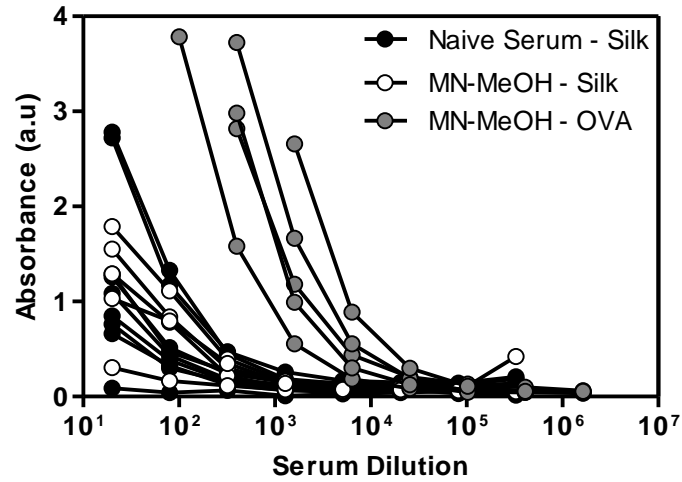

**Supplemental Figure 4** | Silk is non-immunogenic. Mice were vaccinated on day 0 by microneedle treatment ( $\pm$ methanol to cross-link silk implants) to deliver 9  $\mu$ g OVA and 150 ng polyI:C. Microneedles were fabricated with 98% of the total vaccine dose in the PAA fraction, with the remaining 2% in the silk implant (MN PAA(98)/Silk(2) and MN PAA(98)/MeOH-Silk(2)). Shown are anti-Silk or anti-OVA (representative positive responses) serum dilution curves for naïve serum and MN PAA(98)/MeOH-Silk(2) immunized animals.
